# Supplementary material for: Combining Nanopore and Illumina Sequencing Permits Detailed Analysis of Insertion Mutations and Structural Variations Produced by PEG-Mediated Transformation in <em>Ostreococcus tauri</em>
Source: Preprints.org preprint supplement (doi:10.20944/preprints202102.0506.v1), 2021-02-23
Supplement: Supplementary file 3 [file Figure_S3.docx]

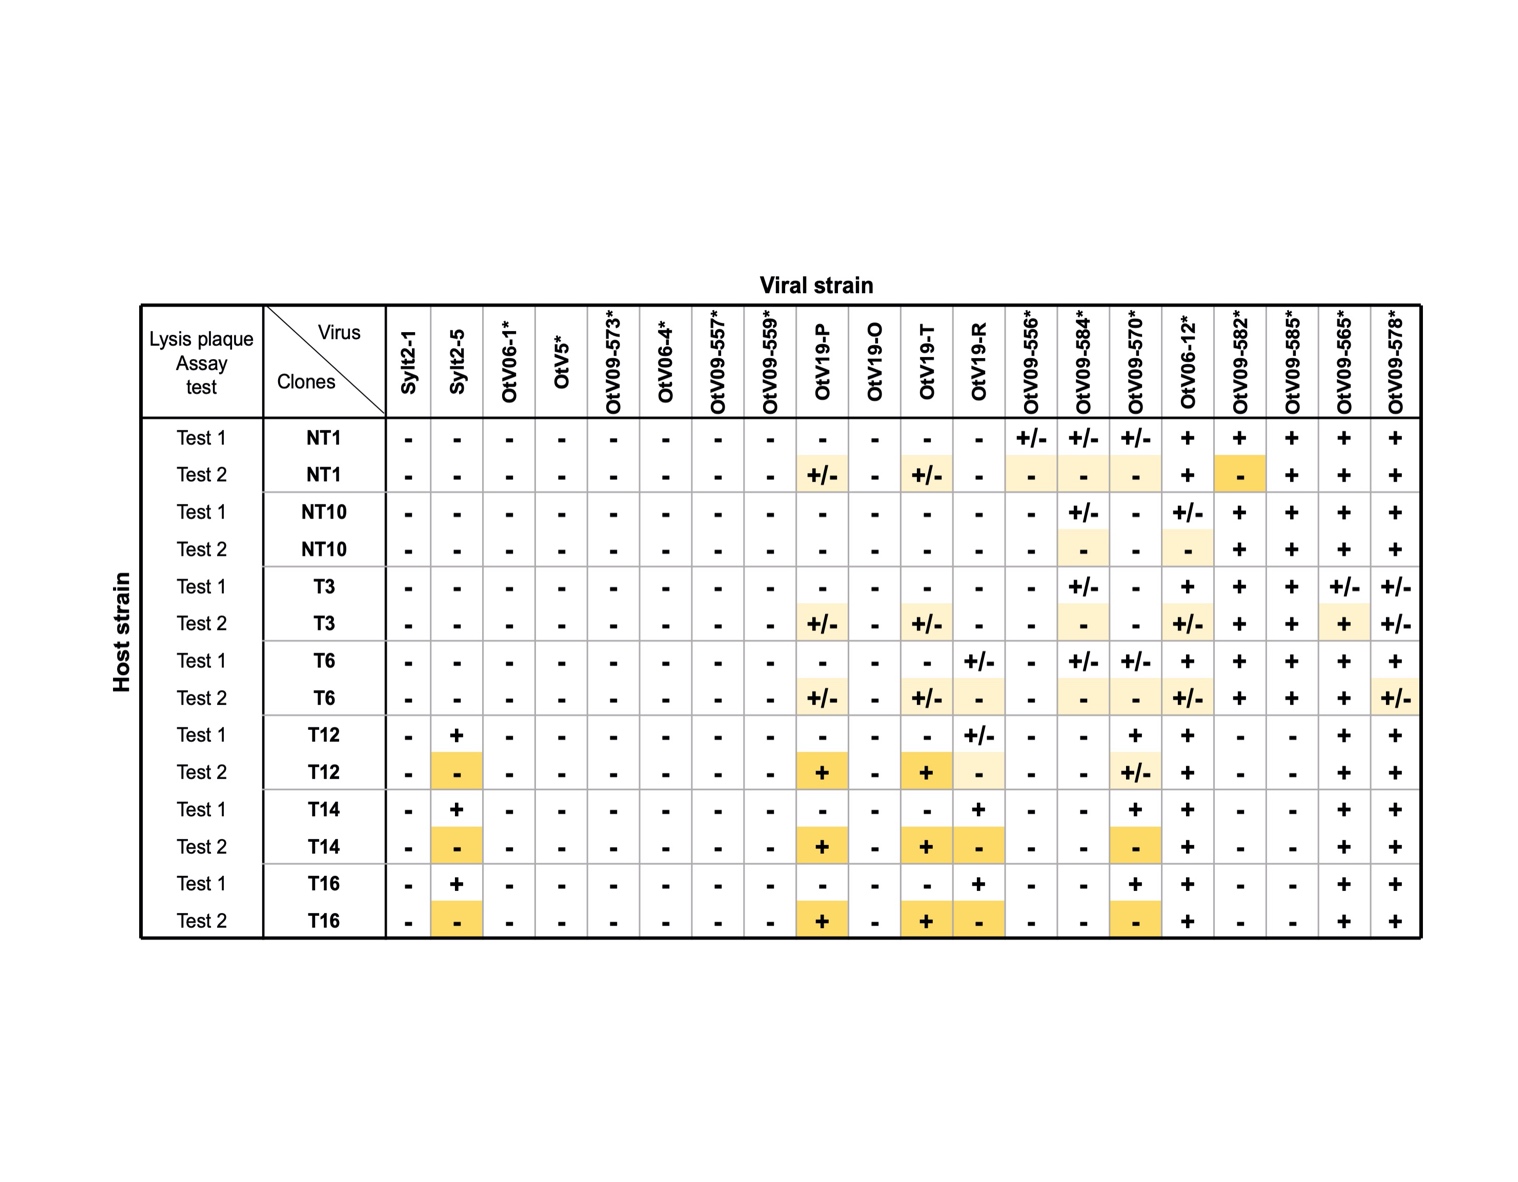


Figure S3. Spectrum of viral infectivity of untransformed (NTx) and transformed (Tx) clonal lines to twenty prasinoviruses (*viruses from Clerissi et al, 2012). Two plaque assay tests were carried out three months apart (Test 1 and Test 2). Dark yellow background: large difference in viral lysis phenotype in test 2 compared to test 1 result. Light yellow background: moderate difference in viral lysis phenotype in test 2 compared to test 1 result. -: no lysis; +: high lysis; +/-: low lysis.
