# Supplementary material for: Combining Nanopore and Illumina Sequencing Permits Detailed Analysis of Insertion Mutations and Structural Variations Produced by PEG-Mediated Transformation in <em>Ostreococcus tauri</em>
Source: Preprints.org preprint supplement (doi:10.20944/preprints202102.0506.v1), 2021-02-23
Supplement: Supplementary file 4 [file Figure_S4.docx]

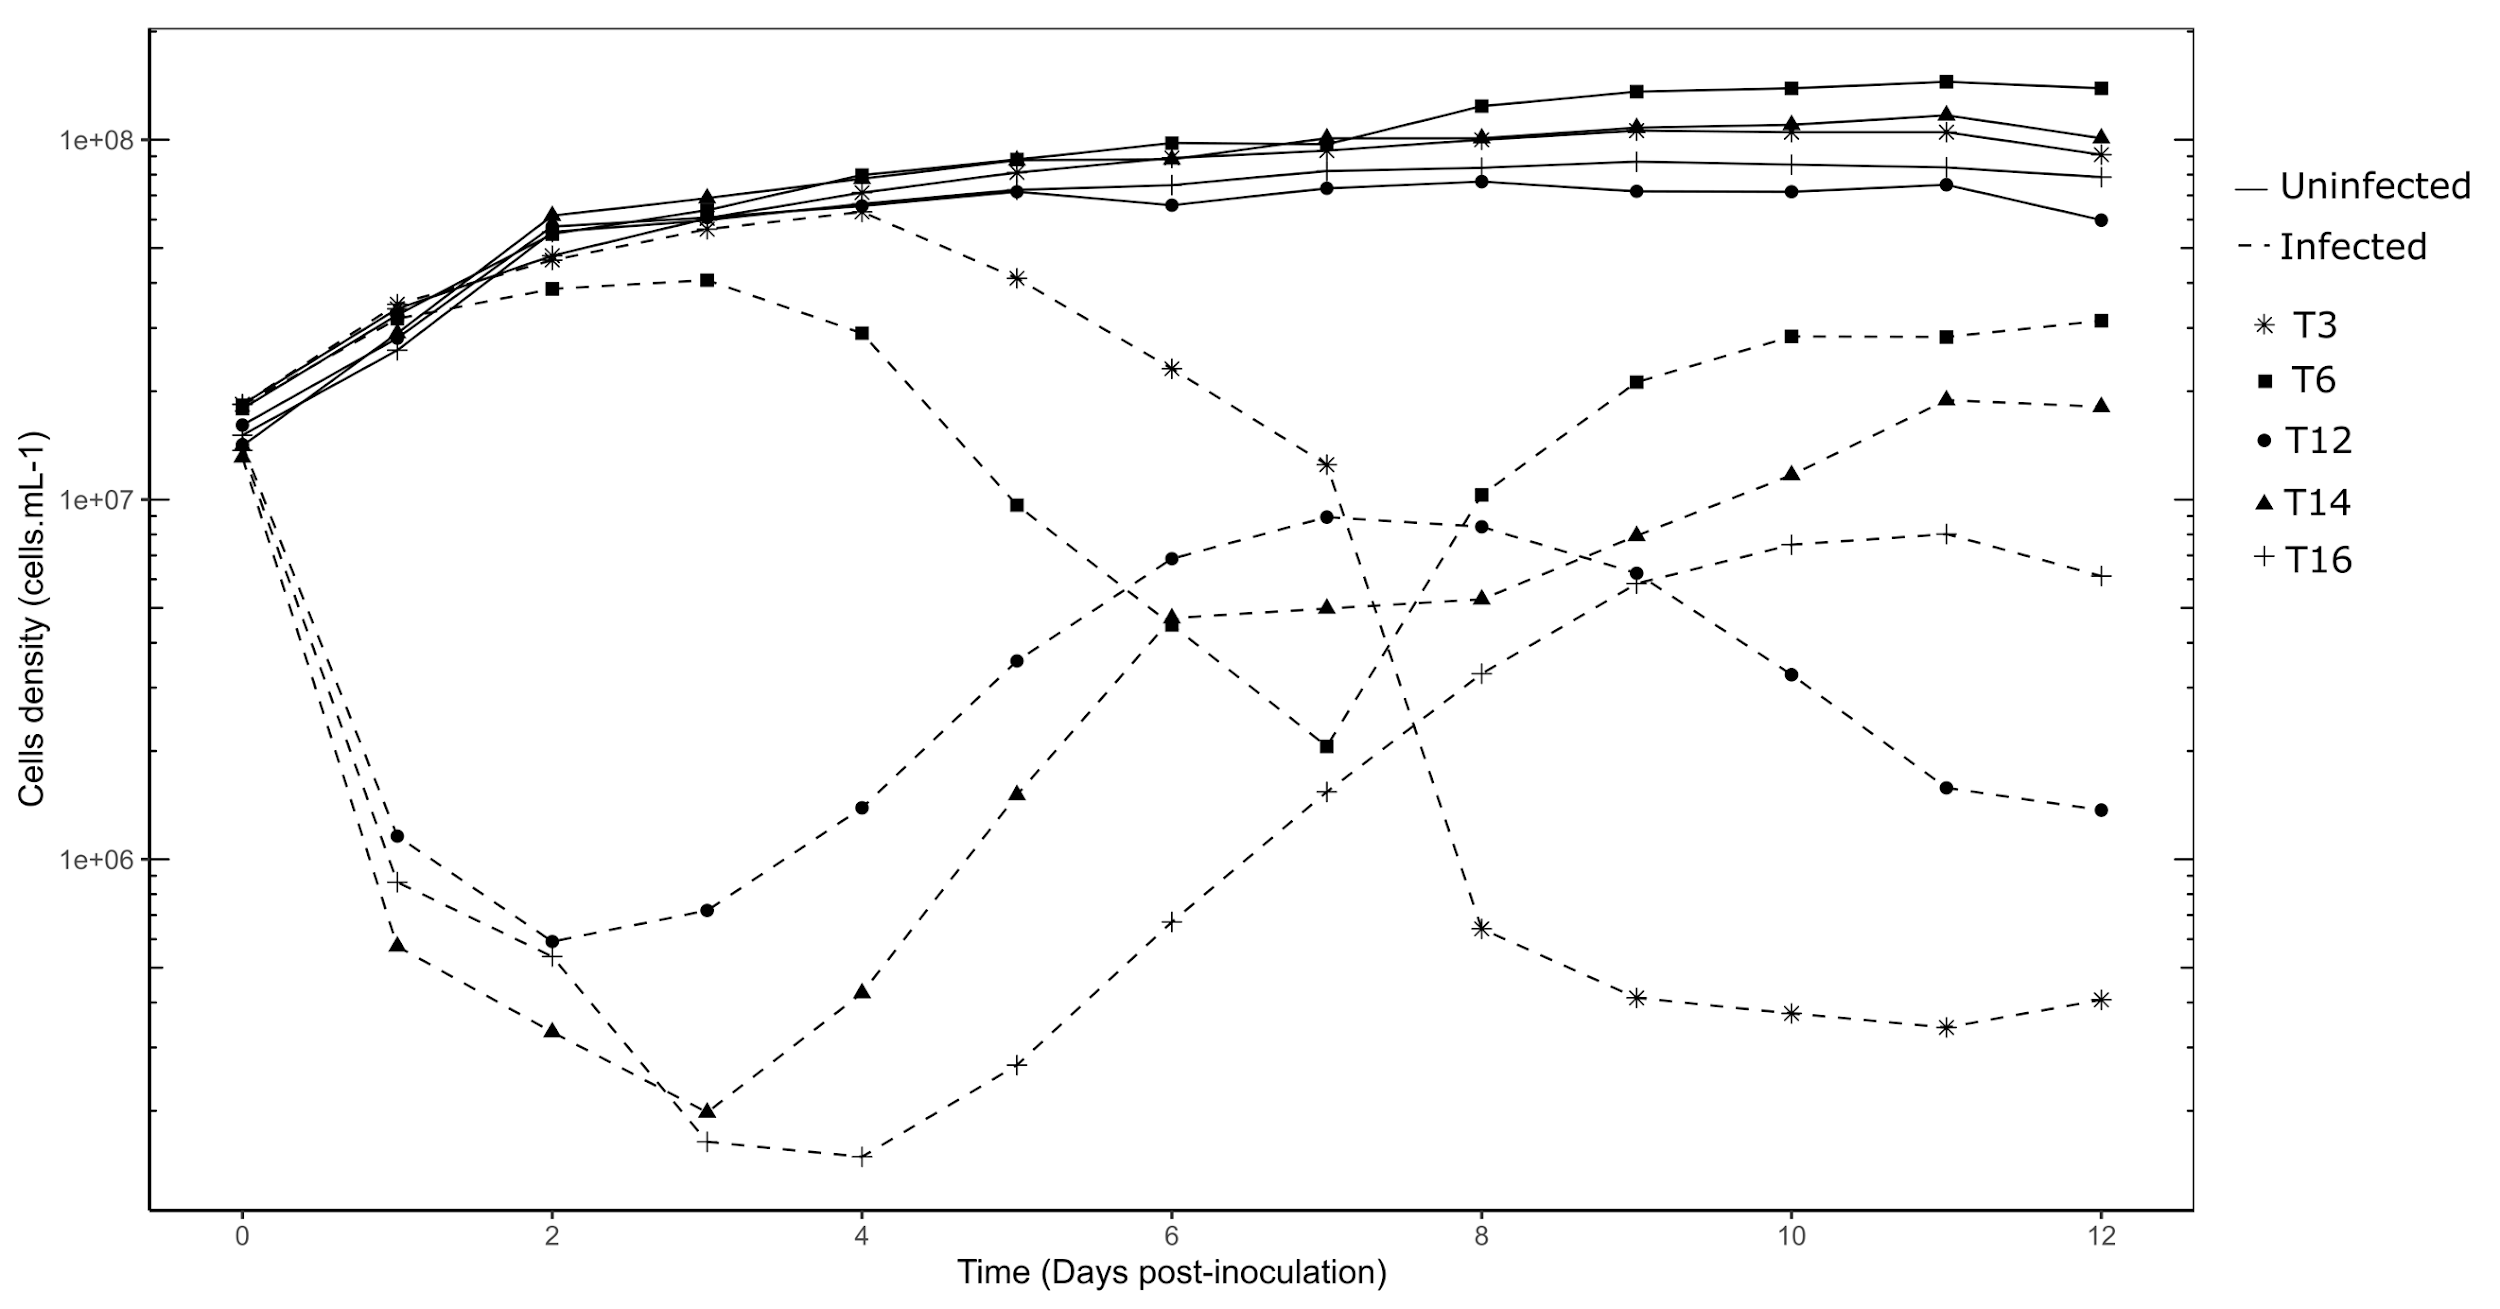


Figure S4. Cell dynamics of transformed clonal lines during 12 days post-inoculation (DPI). Solid lines represent the mock-inoculated control cultures and dashed lines are cultures infected with the OtV09-578 virus (isolated in Clerissi et al, 2012) at multiplicity of infection: MOI 5. Each point represents one replicate of each culture. The peak in cell lysis occurs at 3 DPI in the T12, T14 and T16 transformed lines in contrast to the T3 and T6 lines where the peak in lysis is observed after 7 DPI. Note that regrowth of OtV09-578-resistant cells was observed by flow cytometry.
