# Supplementary material for: Combining Nanopore and Illumina Sequencing Permits Detailed Analysis of Insertion Mutations and Structural Variations Produced by PEG-Mediated Transformation in <em>Ostreococcus tauri</em>
Source: Preprints.org preprint supplement (doi:10.20944/preprints202102.0506.v1), 2021-02-23
Supplement: Supplementary file 5 [file Figure_S5.docx]

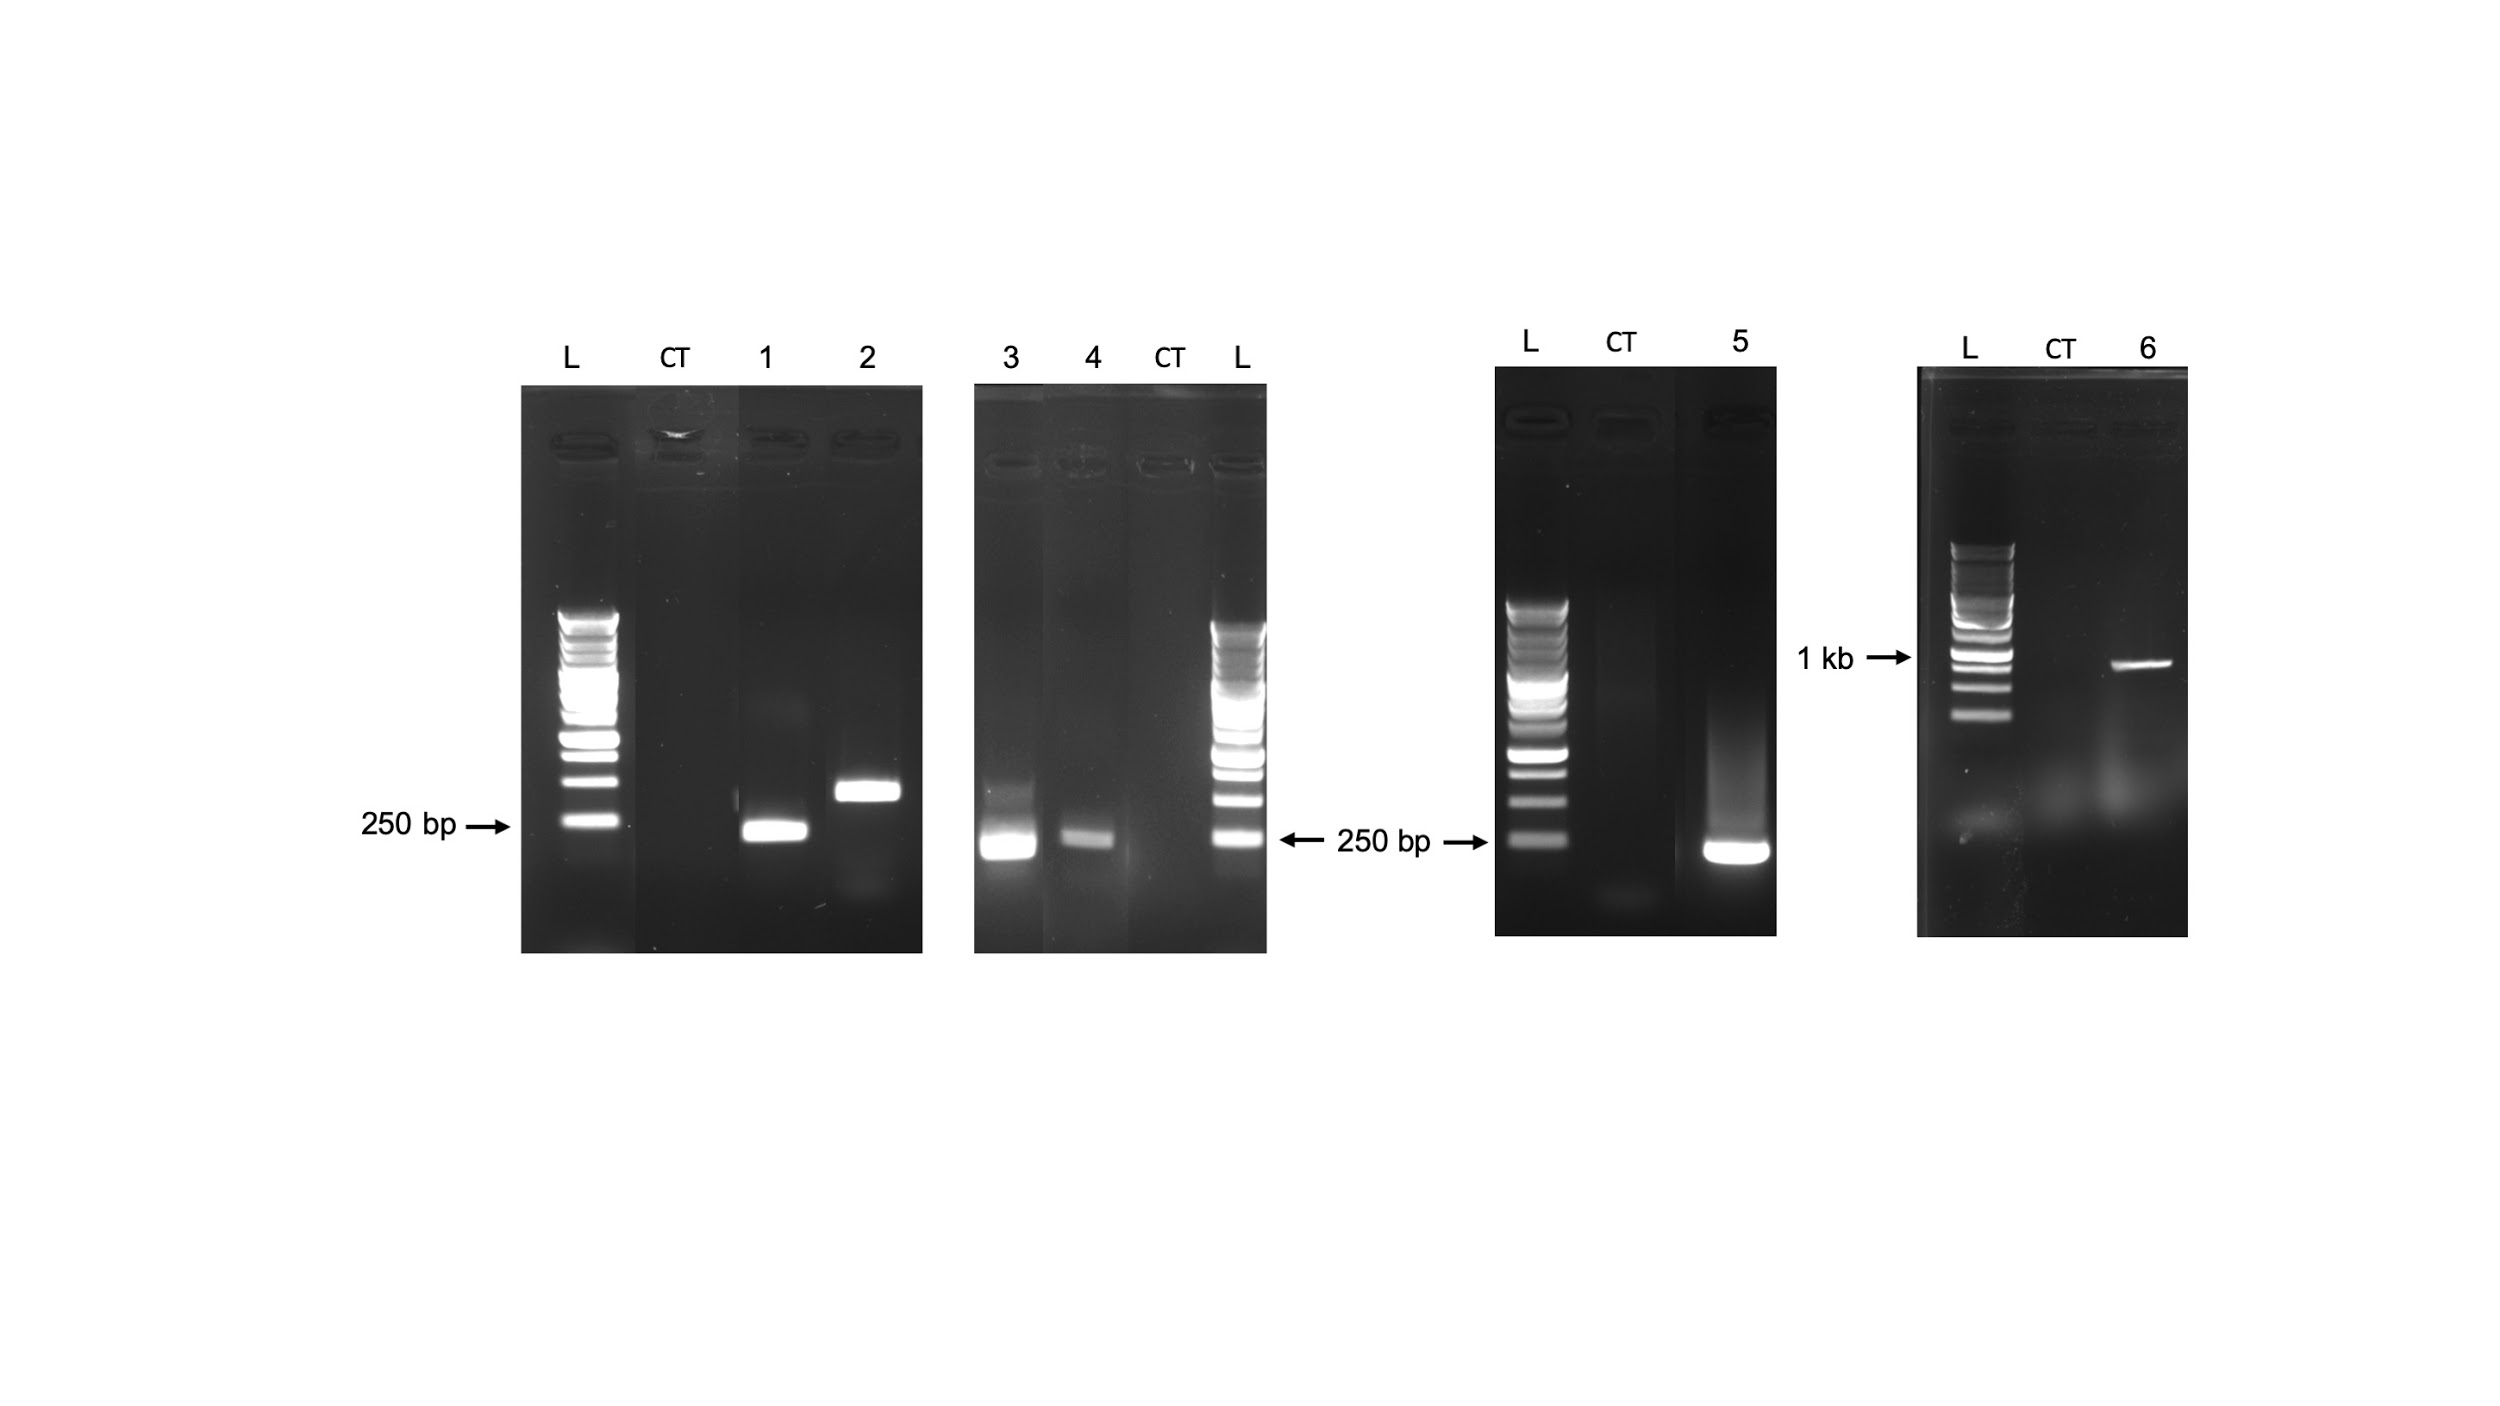


Figure S5. Confirmation of flanking regions using PCR amplification and analysis of PCR-products on electrophoresis gels. T3 line on chromosome 1 (1) at the 5’-end and (4) at the 3’-end. T6 line on chromosome 9 (3) at the 5’-end and (2) the 3’-end. T16 line on chromosome 20 (6) at the 5’-end and (5) at the 3’-end. The primers used and amplicon product size are found in the Table S5. The sequences of the PCR-products are detailed in Figure S6. CT corresponds to negative control ; L : ladder (promega, G5711).
