# Supplementary material for: Combining Nanopore and Illumina Sequencing Permits Detailed Analysis of Insertion Mutations and Structural Variations Produced by PEG-Mediated Transformation in <em>Ostreococcus tauri</em>
Source: Preprints.org preprint supplement (doi:10.20944/preprints202102.0506.v1), 2021-02-23
Supplement: Supplementary file 6 [file Figure_S6.docx]

T3_5'-end of flanking junction:

5'-TGAAGTGCTGCAGCAACTTGAACGGGCACTCCATTGATCCGTATAGGATTCACGTAATGAATCGGCCAACGCGCGGGGAGAGGCGGTTTGCGTATTGGGCGCTCTTCCGCTTCCTCTCAACCAAGTCATTCTGAGAATAG-3'

T3_3'-end of flanking junction:

5'-CGCTCAGTGGAACGAAAACTCACGTTAAGGGATTTTGGTCATGAGATTATCAAAAAGGATCTTCACCTAGATCCTTTTTTTATACTCTGGACGGAAAACGCCCATCGACGTCACACACGCACCGACCATCATACTCTGGACGGAAAACGCCCATCGACGAACAACGAGGCGAGAC-3'

T6_5'-end of flanking junction: 5'-TCGCTCTCGAACTCGCGTCGCATCGACCAATGACCAATATTCCGATTGGTATGGCTTCATTCAGCTCCGGTTCC-3'

T6_3'-end of flanking junction:

5'-GCTGCATGTGTCAGAGGTTTTCACCGTCATCACCGAAACGCGCGAGACGAAAGGGCCTCGTGATACGCCTATTTTTATAGGTTAATGTCATGATAATAATGGTTTCTTAGACGTCAGGTGGCACTTTTCGGGGAAATGTGCGCGGAACCCCTATTTGTTTATTGCGTCGATGCGACGCGAGTTATGGGACCATTAACCGACCTCGGTGCGTTCTTGATGTTTCTGTTTCTCCGCCTGTACCCGC-3'

T16_5'-end of flanking junction:

5'-TGACCCGAGGACGCGTTCGTGGGCGACGCCGGGAGGTCTTCCTGCGCCAAGGCCGGCAGATCCCTGGGATCTGCGTCTCCAAAAGCGCTGGACCCTCACCAGTCACAGAAAAGCATCTTACGGATGGCATGACAGTAAGAGAATTATGCAGTGCTGCCATAACCATGAGTGATAACACTGCGGCCAACTTACTTCTGACAACGATCGGAGGACCGAAGGAGCTAACCGCTTTTTTGCACAACATGGGGGATCATGTAACTCGCCTTGATCGTTGGGAACCGGAGCTGAATGAAGCCATACCAAACGACGAGCGTGACACCACGATGCCTGTAGCAATGGCAACAACGTTGCGCAAACTATTAACTGGCGAACTACTTACTCTAGCTTCCCGGCAACAATTAATAGACTGGATGGAGGCGGATAAAGTTGCAGGACCACTTCTGCGCTCGGCCCTTCCGGCTGGCTGGTTTATTGCTGATAAATCTGGAGCCGGTGAGCGTGGGTCTCGCGGTATCATTGCAGCACTGGGGCCAGATGGTAAGCCCTCCCGTATCGTAG-3'

T16_3'-end of flanking junction:

5'-TATTATCCCGTATTGACGCCGGGCAAGAGCAACTCGGTCGCCGCATACACTATTCTCAGAATGACTTGGTTGAGTGGCGCGCGACGGACGACCCCCCATCTCGCGCCGCGCCACGCGT-3'

Figure S6. PCR-product sequences corresponding to both flanking regions (5'-end and 3'-end) of the pOLK4 vector (dark blue) integration site in the (**A**) T3, (**B**) T6 and (**C**) T16 clonal lines. The insertions of foreign DNA of non-vector origin are shown in red. The light blue represents the duplicated region of the vector.
