# Supplementary material for: Combining Nanopore and Illumina Sequencing Permits Detailed Analysis of Insertion Mutations and Structural Variations Produced by PEG-Mediated Transformation in <em>Ostreococcus tauri</em>
Source: Preprints.org preprint supplement (doi:10.20944/preprints202102.0506.v1), 2021-02-23
Supplement: Supplementary file 8 [file Table_S1.xlsx]

## Sheet: Feuil1
Chromosome	SequenceIDs	Genbank Accessions	Length (bp)	Genomic coverage (X)
				NT1	NT10	T3	T6	T12	T14	T16
Chr 1	BE221ch_0100	KZ155838.1	1,133,678	441.39	541.901	803.52	497.968	477.033	479.873	598.907
Chr 2	BE221ch_0200	KZ155839.1	1,047,055	459.843	574.416	826.832	513.402	499.251	469.237	647.937
Chr 3	BE221unitig_81	KZ155826.1	757.52	441.14	539.563	794.585	496.417	477.428	485.323	598.512
	BE221unitig_19	KZ155786.1	167.014	457.081	572.744	885.144	524.613	524.019	512.496	699.139
Chr 4	BE221unitig_4	KZ155773.1	41.794	519.849	684.865	1,050.11	595.584	629.048	554.689	879.724
	BE221unitig_1	KZ155771.1	912.241	443.015	546.807	805.741	502.327	478.877	481.416	602.617
Chr 5	BE221unitig_7	KZ155776.1	869.748	445.431	544.531	805.235	499.597	481.422	484.362	601.756
Chr 6	BE221unitig_5	KZ155774.1	851.824	452.181	548.966	811.275	504.045	486.801	486.974	613.495
Chr 7	BE221unitig_10	KZ155778.1	781.149	438.503	537.302	796.474	498.404	472.932	478.751	595.894
Chr 8	BE221unitig_12	KZ155780.1	717.684	441.303	543.936	805.753	501.797	478.413	480.375	597.583
Chr 9	BE221unitig_3	KZ155772.1	626.729	430.53	529.987	993.001	616.293	468.86	471.013	588.112
	BE221unitig_9	KZ155777.1	130.901	436.141	542.979	837.143	509.44	494.028	496.749	642.608
Chr 10	BE221unitig_13	KZ155781.1	83.803	430.214	512.405	736.224	471.515	467.164	472.779	617.414
	BE221unitig_88	KZ155832.1	555.949	444.602	540.525	801.836	495.713	478.271	475.606	598.847
Chr 11	BE221unitig_87	KZ155831.1	310.47	462.459	561.266	801.978	510.222	484.758	485.06	627.27
	BE221unitig_15	KZ155783.1	322.813	445.604	541.453	792.26	496.309	478.234	484.395	596.167
Chr 12	BE221unitig_14	KZ155782.1	226.705	447.087	557.791	843.195	514.062	501.447	501.675	648.257
	BE221unitig_96	KZ155835.1	366.48	449.785	547.99	799.886	501.296	486.121	485.895	611.429
Chr 13	BE221unitig_16	KZ155784.1	572.89	455.636	560.477	833.083	514.493	497.199	494.633	625.061
Chr 14	BE221unitig_17	KZ155785.1	558.526	440.512	540.61	797.773	500.188	476.168	476.431	586.159
Chr 15	BE221unitig_1	KZ155771.1	912.241	456.262	554.636	820.344	504.44	496.796	495.37	626.401
	BE221unitig_23	KZ155789.1	125.746	463.764	584.532	917.542	525.335	541.833	500.622	712.491
	BE221unitig_29	KZ155793.1	175.066	469.335	583.586	874.024	523.673	539.623	521.404	685.347
Chr 16	BE221unitig_79	KZ155825.1	333.935	459.302	549.948	810.691	502.248	496.275	485.178	621.22
	BE221unitig_20	KZ155787.1	189.473	420.601	517.969	769.184	479.837	451.032	453.612	562.341
Chr 17	BE221unitig_24	KZ155790.1	424.376	440.369	542.7	800.975	499.721	473.475	475.886	579.999
Chr 18	BE221unitig_25	KZ155791.1	363.195	457.437	549.866	799.729	503.172	488.016	490.611	603.498
Chr 19	BE221ch_1900	KZ155840.1	369.517	490.018	609.618	918.628	545.069	550.142	392.824	720.047
Chr 20	BE221unitig_33	KZ155795.1	161.637	452.38	569.278	862.564	530.847	508.415	557.269	656.103
	BE221unitig_86	KZ155830.1	26.996	444.666	552.071	818.039	523.39	486.03	558.702	619.732
Mitochondrion		KC967299.1	44.237	1,430.7	1,477.68	2,023.5	1,714.88	1,141.83	1,313.55	2,009.99
Chloroplast		KF285526.1	75.36	2,023.4	2,020.82	2,596.34	2,124.41	1,636.86	1,501.37	2,621.55
Table S1. Genomic coverage (X) of each chromosome in transformed (Tx) and untransformed (NTx) clonal lines in O. tauri RCC1115 strain. The ID of the assembled contig of the reference genome in genbank (SequenceIDs) was associated to the number of the corresponding chromosome (Chromosome) used in this study. Red color shows the corresponding reference contig where the insertion event is occured in…
