# Supplementary material for: Combining Nanopore and Illumina Sequencing Permits Detailed Analysis of Insertion Mutations and Structural Variations Produced by PEG-Mediated Transformation in <em>Ostreococcus tauri</em>
Source: Preprints.org preprint supplement (doi:10.20944/preprints202102.0506.v1), 2021-02-23
Supplement: Supplementary file 9 [file Table_S2.docx]

| Clones | Total lengths of the mapped reads to vector (bp) | Average coverage (X) | Read pairs mapped to vector | Proper pairs mapped | Junction pairs mapped | Average insert size to vector |
| --- | --- | --- | --- | --- | --- | --- |
| T3 | 3,973,340 | 649 | 39,220 | 35,808 | 1,369 | 284 |
| T6 | 1,876,782 | 306 | 18,502 | 16,108 | 891 | 302 |
| T12 | 11,927,090 | 1947 | 117,73 | 110,66 | 2,294 | 254 |
| T14 | 1,276,034 | 208 | 12,604 | 11,418 | 363 | 335 |
| T16 | 3,252,705 | 531 | 32,087 | 29,814 | 1,083 | 277 |
| T3 | 3,973,340 | 649 | 39,220 | 35,808 | 1,369 | 284 |

**Table S2.** Summary Illumina reads mapping against pOLK4 vector sequence. Total reads length represents the number of processed bases from reads of total length complete vector sequence (6,014 bp).
