# Supplementary material for: Combining Nanopore and Illumina Sequencing Permits Detailed Analysis of Insertion Mutations and Structural Variations Produced by PEG-Mediated Transformation in <em>Ostreococcus tauri</em>
Source: Preprints.org preprint supplement (doi:10.20944/preprints202102.0506.v1), 2021-02-23
Supplement: Supplementary file 10 [file Table_S3.xlsx]

## Sheet: Feuil1
Gene number	Locus tag	Location	Putative function Best hit (NCBI)	Conserved domains	Molecular function	Biological process	Interproscan description	Interproscan ID
1	BE221DRAFT_188217	184,452-185,243 (+)	Hypothetical protein	Formyltransferase, catalytic core domain	-	-	-	-
2	BE221DRAFT_64698	184,067-184,318 (-)	Hypothetical protein	-	-	-	-	-
3	BE221DRAFT_35369	185,628-186,575 (+)	Hypothetical protein	-	-	-	-	-
4	BE221DRAFT_64866	190,360-191,634 (-)	Hypothetical protein	NADB Rossmann super family	Catalytic activity	Carbohydrate metabolism	Nucleotide sugar epimerase	IPR008089
5	BE221DRAFT_47200	191,970-192,182 (+)	Hypothetical protein (partial)	-	-	-	-	-
6	BE221DRAFT_64667	196,643-196,810 (-)	Hypothetical protein (partial)	-	-	-	-	-
7	BE221DRAFT_64947	198,438-198,685 (+)	Hypothetical protein	-	-	-	-	-
8	BE221DRAFT_164682	199,262-200,830 (-)	Hypothetical protein	-	-	-	-	-
9	BE221DRAFT_196615	202,552-203014 (-)	Hypothetical protein	Glycosyltransferase family A	-	Carbohydrate metabolism	Nucleotide-diphospho-sugar transferases	IPR029044
10	BE221DRAFT_54934	203,115-203,357 (+)	Hypothetical protein	-	-	-	-	-
11	BE221DRAFT_196616	204,099-204,698 (+)	Hypothetical protein	-	-	-	-	-
12	BE221DRAFT_164692	205,041-205,475 (+)	Hypothetical protein	-	-	-	-	-
13	BE221DRAFT_4586	206,526-206,905 (+)	Hypothetical protein	-	-	-	-	-
14	BE221DRAFT_164725	212,331-213,910 (-)	Hypothetical protein	-	-	-	-	-
15	BE221DRAFT_143075	216,086-218,596 (-)	Hypothetical protein	-	-	-	-	-
16	BE221DRAFT_164762	232,358-232,911 (+)	Hypothetical protein	-	-	-	-	-
17	BE221DRAFT_64854	233,475-234,858 (-)	Hypothetical protein	-	-	-	-	-
18	BE221DRAFT_196622	235,850-237,055 (+)	Hypothetical protein	Zinc knuckle	Nucleic acid binding	-	Zinc finger CCHC-type	IPR001878
19	BE221DRAFT_64588	247,188-248,174 (+)	Hypothetical protein	-	-	-	-	-
20	BE221DRAFT_64910	249,086-250,423 (+)	Hypothetical protein	-	-	-	-	-
21	BE221DRAFT_86599	250,941-251,261 (-)	Hypothetical protein	-	-	-	-	-
22	BE221DRAFT_196627	252,134-253,057 (-)	Hypothetical protein	DNA breaking-rejoining enzymes, C-terminal catalytic domain	DNA binding	-	DNA breaking-rejoining enzyme	IPR011010
23	BE221DRAFT_65015	261,733-262,725 (+)	Hypothetical protein (partial)	Nucleotide-sugar transporter VRG4/SQV-7	-	-	-	-
24	BE221DRAFT_38211	262,921-263,784 (+)	Hypothetical protein	-	-	-	-	-
25	BE221DRAFT_216050	265,331-267,414 (+)	UDP-glucose 4-epimerase/UDP-sulfoquinovose synthase	Rhamnose biosynthetic enzyme	Catalytic activity	Carbohydrate metabolism	NAD-dependent epimerase/dehydratase	IPR001509
26	BE221DRAFT_65075	279,673-281,892 (-)	Hypothetical protein	-	-	-	-	-
27	BE221DRAFT_64723	281,951-282,202 (+)	Hypothetical protein	-	-	-	-	-
28	BE221DRAFT_164898	284,440-285,264 (+)	Hypothetical protein	-	-	-	-	-
29	BE221DRAFT_54676	287,574-288,604 (-)	Hypothetical protein (partial)	-	-	-	-	-
30	BE221DRAFT_196634	289,513-290,565 (+)	Hypothetical protein	-	-	-	-	-
31	BE221DRAFT_164904	290,671-290,858 (+)	Hypothetical protein (partial)	-	-	-	-	-
Table S3. Prediction of the function of deleted unique genes on chromosome 19 in T14 clonal line.
