# Supplementary material for: Combining Nanopore and Illumina Sequencing Permits Detailed Analysis of Insertion Mutations and Structural Variations Produced by PEG-Mediated Transformation in <em>Ostreococcus tauri</em>
Source: Preprints.org preprint supplement (doi:10.20944/preprints202102.0506.v1), 2021-02-23
Supplement: Supplementary file 11 [file Table_S4.xlsx]

## Sheet: Feuil1
Clones	Relative luminescence units (RLU)
NT1	601
NT1D	717
NT2	586
NT3	643
NT10	646
NT10D	634
T1	1.943
T2	540
T3	1.576
T3D	1.557
T4	2.829
T5	2.446
T6	3.623
T6D	3.429
T7	2.131
T8	518
T9	621
T10	5.492
T11	2.302
T12	9.57
T12D	7.262
T13	2.197
T14	469
T14D	488
T15	3.421
T16	4.756
T16D	4.371
T17	419
T18	634
T19	4.455
Table S4. Raw relative luminescence units (RLU) data in untransformed (NTx) and Transformed (Tx) and some thawed (D) in independent clonal lines.
