# Supplementary material for: Combining Nanopore and Illumina Sequencing Permits Detailed Analysis of Insertion Mutations and Structural Variations Produced by PEG-Mediated Transformation in <em>Ostreococcus tauri</em>
Source: Preprints.org preprint supplement (doi:10.20944/preprints202102.0506.v1), 2021-02-23
Supplement: Supplementary file 12 [file Table_S5.xlsx]

## Sheet: T3
	Reference genome RCC1115			T3 Masurca-Flye Assembly
Chromosome	Name	Accession number	Length (bp)	Name	Length (bp)
1	BE221ch_0100	KZ155838.1	1,133,678	contig_59	502.871
				contig_47	172.988
				contig_11	480.381
2	BE221ch_0200	KZ155839.1	1,047,055	contig_2	364.761
				contig_7	184.92
				contig_32	32.74
				contig_31	491.608
3	BE221unitig_81	KZ155826.1	757.52	contig_33	663.498
				contig_39	634.423
	BE221unitig_82	KZ155827.1	129.585	contig_33	663.498
	BE221unitig_19	KZ155786.1	167.014	contig_26	159.907
4	BE221unitig_4	KZ155773.1	41.794	contig_83	28.36
				contig_22	1,444,573
	BE221unitig_1	KZ155771.1	912.241
5	BE221unitig_7	KZ155776.1	869.748	contig_5	620.603
				contig_53	257.972
6	BE221unitig_05	KZ155774.1	851.824	contig_19	848535
7	BE221unitig_10	KZ155778.1	781.149	contig_37	793902
8	BE221unitig_12	KZ155780.1	717.684	contig_60	117.994
				contig_20	733.393
9	BE221unitig_03	KZ155772.1	626.729	contig_55	615709
				contig_85	36392
	BE221unitig_09	KZ155777.1	130.901	contig_71	124880
10	BE221unitig_13	KZ155781.1	83.803	contig_1	622.939
	BE221unitig_88	KZ155832.1	555.949
11	BE221unitig_87	KZ155831.1	310.47	contig_12	620.342
	BE221unitig_15	KZ155783.1	322.813
12	BE221unitig_14	KZ155782.1	226.705	contig_57	213057
	BE221unitig_96	KZ155835.1	366.48	contig_6	375237
13	BE221unitig_16	KZ155784.1	572.89	contig_22	1,444,573
				contig_8	54.735
14	BE221unitig_17	KZ155785.1	558.526	contig_13	411.236
				contig_74	164511
15	BE221unitig_1	KZ155771.1	285.2	contig_49	255.544
	BE221unitig_23	KZ155789.1	125.746	contig_60	117.994
				contig_20	733.393
	BE221unitig_29	KZ155793.1	175.066	scaffold_72	149.019
16	BE221unitig_79	KZ155825.1	333.935	contig_17	503.592
	BE221unitig_20	KZ155787.1	189.473
17	BE221unitig_24	KZ155790.1	424.376	contig_33	663.498
				contig_39	634.423
18	BE221unitig_25	KZ155791.1	363.195	contig_84	84.228
				contig_61	209.994
				contig_40	85.306
19	BE221ch_1900	KZ155840.1	369.517	contig_4	187.748
				contig_21	63084
				contig_29	49365
				contig_34	50.722
20	BE221unitig_33	KZ155795.1	161.637	contig_45	161.388
	BE221unitig_86	KZ155830.1	26.996	contig_27	27.862
Mitochondrion	Mitochondrion	KC967299.1	44.237	contig_73	44.236
Chloroplast	Chloroplast	KF285526.1	75360	contig_81	35.709
				contig_78	26.425
Figure S5. Correspondence of the reference genome RCC1115 to the Masurca-Flye assembly in the transformed clonal lines

## Sheet: T6
	Reference genome RCC1115			T6 Masurca-Flye Assembly
Chromosome	Name	Accession number	Length (bp)	Name	Length (bp)
1	BE221ch_0100	KZ155838.1	1,133,678	contig_2	502.825
				contig_54	172.266
				contig_16	473.717
2	BE221ch_0200	KZ155839.1	1,047,055	contig_6	552.991
				contig_28	31.048
				contig_33	473.332
3	BE221unitig_81	KZ155826.1	757.52	contig_10	820.77
				contig_23	640.567
	BE221unitig_82	KZ155827.1	129.585	contig_10	820.77
	BE221unitig_19	KZ155786.1	167.014
4	BE221unitig_4	KZ155773.1	41.794	contig_7	961.5
				contig_10	820.77
	BE221unitig_1	KZ155771.1	912.241	contig_7	961.5
5	BE221unitig_7	KZ155776.1	869.748	contig_8	244.093
				scaffold_32	641.722
6	BE221unitig_05	KZ155774.1	851.824	contig_12	850.436
7	BE221unitig_10	KZ155778.1	781.149	contig_22	782.627
8	BE221unitig_12	KZ155780.1	717.684	contig_42	124.973
				contig_15	737.561
9	BE221unitig_03	KZ155772.1	626.729	contig_1	384.222
				conig_25	87.957
				contig_69	115.454
				contig_38	150.316
	BE221unitig_09	KZ155777.1	130.901	contig_38	150.316
10	BE221unitig_13	KZ155781.1	83.803	contig_4	623.69
	BE221unitig_88	KZ155832.1	555.949
11	BE221unitig_87	KZ155831.1	310.47	contig_5	1,179,249
	BE221unitig_15	KZ155783.1	322.813
12	BE221unitig_14	KZ155782.1	226.705	contig_41	201.962
	BE221unitig_96	KZ155835.1	366.48	contig_11	383.295
13	BE221unitig_16	KZ155784.1	572.89	contig_19	512.251
				contig_17	55.031
14	BE221unitig_17	KZ155785.1	558.526	contig_5	1,179,249
15	BE221unitig_1	KZ155771.1	285.2	contig_65	285.148
				contig_15	737.561
				contig_36	201.804
				contig_50	107.169
				contig_59	79.778
	BE221unitig_23	KZ155789.1	125.746	contig_42	124973
				contig_15	737.561
	BE221unitig_29	KZ155793.1	175.066	contig_26	148.173
16	BE221unitig_79	KZ155825.1	333.935	contig_14	477.391
	BE221unitig_20	KZ155787.1	189.473
17	BE221unitig_24	KZ155790.1	424.376	contig_23	640.567
				contig_10	820.77
18	BE221unitig_25	KZ155791.1	363.195	contig_50	107.169
				Contig_59	79.778
				contig_70	237.027
19	BE221ch_1900	KZ155840.1	369.517	contig_3	328.262
				contig_13	48.638
20	BE221unitig_33	KZ155795.1	161.637	contig_36	201.804
	BE221unitig_86	KZ155830.1	26.996	contig_51	27.063
Mitochondrion	Mitochondrion	KC967299.1	44.237	contig_39	55.879
Chloroplast	Chloroplast	KF285526.1	75360	contig_58	35711
				contig_21	26438

## Sheet: T12
	Reference genome RCC1115			T12 Masurca-Flye Assembly
Chromosome	Name	Accession number	Length (bp)	Name	Length (bp)
1	BE221ch_0100	KZ155838.1	1,133,678	contig_64	34.591
				contig_160	39.747
				contig_7	388.426
				contig_10	208.854
				contig_77	100.516
				contig_103	385.754
2	BE221ch_0200	KZ155839.1	1,047,055	contig_13	249.333
				contig_116	95.187
				contig_165	16.938
				contig_9	76.026
				contig_65	163.977
				contig_151	67.744
				contig_104	190.837
				contig_123	325.552
				contig_26	19.841
3	BE221unitig_81	KZ155826.1	757.52	contig_53	413.717
				contig_102	457.737
	BE221unitig_82	KZ155827.1	129.585	contig_53	413.717
	BE221unitig_19	KZ155786.1	167.014	contig_107	151.984
4	BE221unitig_4	KZ155773.1	41.794	contig_34	29.234
	BE221unitig_1	KZ155771.1	912.241	contig_129	919.759
5	BE221unitig_7	KZ155776.1	869.748	contig_11	378.03
				contig_52	872.56
6	BE221unitig_05	KZ155774.1	851.824	contig_39	380.17
				contig_5	480.499
7	BE221unitig_10	KZ155778.1	781.149	contig_44	718.953
				contig_2	71.56
8	BE221unitig_12	KZ155780.1	717.684	contig_20	381.091
				contig_75	330.437
9	BE221unitig_03	KZ155772.1	626.729	contig_73	58.163
				contig_140	337.319
				contig_11	378.03
				contig_52	872.56
	BE221unitig_09	KZ155777.1	130.901	contig_52	872.56
10	BE221unitig_13	KZ155781.1	83.803	contig_91	644.463
	BE221unitig_88	KZ155832.1	555.949	contig_91	644.463
				contg_104	190.837
				contig_151	67.744
				contig_65	163.977
				contig_95	81.247
11	BE221unitig_87	KZ155831.1	310.47	contig_42	303
	BE221unitig_15	KZ155783.1	322.813	contig_88	320.654
12	BE221unitig_14	KZ155782.1	226.705	contig_98	225.141
	BE221unitig_96	KZ155835.1	366.48	contig_78	87.244
				contig_24	211.649
				contig_93	80.948
13	BE221unitig_16	KZ155784.1	572.89	contig_6	574.296
14	BE221unitig_17	KZ155785.1	558.526	contig_92	83.882
				contig_84	17.028
				contig_130	330.704
				contig_135	157.337
15	BE221unitig_1	KZ155771.1	285.2	contig_61	228.085
				contig_70	153.246
	BE221unitig_23	KZ155789.1	125.746	contig_70	153.246
	BE221unitig_29	KZ155793.1	175.066	contig_83	58
				contig_47	105.132
16	BE221unitig_79	KZ155825.1	333.935	contig_142	134.574
				contig_18	92.664
				contig_118	270.575
	BE221unitig_20	KZ155787.1	189.473	contig_118	270.575
17	BE221unitig_24	KZ155790.1	424.376	contig_73	58.163
				contig_22	392.935
18	BE221unitig_25	KZ155791.1	363.195	contig_117	70.937
				contig_74	185.592
				contig_147	100.284
19	BE221ch_1900	KZ155840.1	369.517	contig_31	36.763
				contig_33	142.523
				contig_60	17.557
				contig_12	56.219
				contig_114	24.639
				contig_65	163.977
20	BE221unitig_33	KZ155795.1	161.637	contig_8	142.551
				contig_150	20.589
	BE221unitig_86	KZ155830.1	26.996	contig_57	30.596
Mitochondrion	Mitochondrion	KC967299.1	44.237	contig_157	13.043
				contig_113	11.655
Chloroplast				contig_112	9.771
	Chloroplast	KF285526.1	75360	contig_97	35.711
				contig_132	26.426

## Sheet: T14
	Reference genome RCC1115			T14 Masurca-Flye Assembly
Chromosome	Name	Accession number	Length (bp)	Name	Length (bp)
1	BE221ch_0100	KZ155838.1	1,133,678	contig_149	26.898
				contig_67	28.108
				contig_134	598.49
				contig_120	118.877
				contig_159	151.295
				conti_53	69.171
2	BE221ch_0200	KZ155839.1	1,047,055	contig_68	34.855
				contig_168	158.758
				contig_110	139.579
				contig_99	92.704
				contig_130	54.568
				contig_15	55.502
				contig_126	21.204
				contig_39	483.689
3	BE221unitig_81	KZ155826.1	757.52	contig_25	753.19
	BE221unitig_82	KZ155827.1	129.585	contig_4	110.873
	BE221unitig_19	KZ155786.1	167.014	contig_16	149.877
4	BE221unitig_4	KZ155773.1	41.794	contig_55	17.353
				contig_150	783.157
	BE221unitig_1	KZ155771.1	912.241	contig_150	783.157
				contig_163	16.581
				contig_1	171.052
5	BE221unitig_7	KZ155776.1	869.748	contig_63	78.137
				contig_47	287.528
				contig_32	611.559
				contig_179	257.096
6	BE221unitig_05	KZ155774.1	851.824	contig_9	731.322
				contig_159	151.295
7	BE221unitig_10	KZ155778.1	781.149	contig_109	568.113
				contig_93	222.386
8	BE221unitig_12	KZ155780.1	717.684	contig_118	490.215
				contig_60	227.57
9	BE221unitig_03	KZ155772.1	626.729	contig_76	337.297
				contig_47	287.528
				contig_32	611.559
				contig_76	337.297
	BE221unitig_09	KZ155777.1	130.901	contig_32	611.559
10	BE221unitig_13	KZ155781.1	83.803	contig_52	545.619
	BE221unitig_88	KZ155832.1	555.949	contig_52	545.619
				contig_12	75.425
11	BE221unitig_87	KZ155831.1	310.47	contig_155	627.824
	BE221unitig_15	KZ155783.1	322.813
12	BE221unitig_14	KZ155782.1	226.705	contig_35	211.756
	BE221unitig_96	KZ155835.1	366.48	contig_106	222.572
				contig_2	17.238
				contig_84	57.378
				contig_162	80.594
13	BE221unitig_16	KZ155784.1	572.89	contig_196	210.097
				contig_45	349.006
14	BE221unitig_17	KZ155785.1	558.526	contig_31	53.593
				contig_50	368.318
				contig_69	146.686
15	BE221unitig_1	KZ155771.1	285.2	contig_11	249.073
				contig_61	142.388
	BE221unitig_23	KZ155789.1	125.746	contig_61	142.388
	BE221unitig_29	KZ155793.1	175.066	contig_156	53.9
				contig_127	101.036
16	BE221unitig_79	KZ155825.1	333.935	contig_27	493.603
	BE221unitig_20	KZ155787.1	189.473
17	BE221unitig_24	KZ155790.1	424.376	contig_85	40.545
				contig_187	284.888
				contig_38	95.637
18	BE221unitig_25	KZ155791.1	363.195	contig_125	70.08
				contig_8	193.079
				contig_28	105.762
19	BE221ch_1900	KZ155840.1	369.517	contig_6	26.386
				scaffold_36	143.585
				contig_5	47.901
20	BE221unitig_33	KZ155795.1	161.637	contg_123	176.279
	BE221unitig_86	KZ155830.1	26.996
Mitochondrion	Mitochondrion	KC967299.1	44.237	contig_14	13.043
				contig_133	11.665
Chloroplast				contig_140	9.971
	Chloroplast	KF285526.1	75360	contig_174	35.713
				contig_202	26.962

## Sheet: T16
	Reference genome RCC1115			T16 Masurca-Flye Assembly
Chromosome	Name	Accession number	Length (bp)	Name	Length (bp)
1	BE221ch_0100	KZ155838.1	1,133,678	contig_50	26.879
				contig_58	341.711
				contig_20	126.124
				contig_159	142.202
				contig_128	24.919
				contig_163	43.085
				contig_6	410.438
2	BE221ch_0200	KZ155839.1	1,047,055	contig_166	17.938
				contig_2	220.217
				contg_122	36.275
				contig_93	29.279
				contig_44	86.491
				contig_184	23.452
				contig_141	26.681
				contig_10	111.723
				contig_83	121.959
				contig_34	263.501
				contig_60	48.655
3	BE221unitig_81	KZ155826.1	757.52	contig_64	563.293
				contig_63	176.559
				contig_98	63.503
	BE221unitig_82	KZ155827.1	129.585	contig_194	51.24
				contig_92	145.975
	BE221unitig_19	KZ155786.1	167.014
4	BE221unitig_4	KZ155773.1	41.794	contig_179	18.441
	BE221unitig_1	KZ155771.1	912.241	contig_59	39
				contig_41	230.917
				contig_31	510.17
				contig_57	160.453
5	BE221unitig_7	KZ155776.1	869.748	contig_96	101.188
				contig_26	318.913
				contig_9	104.729
				contig_133	342.62
				contig_110	20.542
6	BE221unitig_05	KZ155774.1	851.824	contig_12	396.013
				contig_103	48.63
				contig_78	35.4
				contig_187	127.902
				contig_72	126.489
				contig_19	87.697
7	BE221unitig_10	KZ155778.1	781.149	contig_111	87.832
				contig_99	420.209
				contig_117	227.554
				contig_101	41.715
8	BE221unitig_12	KZ155780.1	717.684	contig_73	298.059
				contig_178	48.448
				contig_13	301.196
				contig_27	64.529
9	BE221unitig_03	KZ155772.1	626.729	contig_46	32.251
				contig_53	235.397
				contig_177	397.402
	BE221unitig_09	KZ155777.1	130.901	contig_177	397.402
				contig_143	54.717
10	BE221unitig_13	KZ155781.1	83.803	contig_28	251.557
	BE221unitig_88	KZ155832.1	555.949	contig_28	251.557
				contig_208	48.848
				contig_89	24119
				contig_146	54.235
				contig_51	220.706
				contig_142	27.076
11	BE221unitig_87	KZ155831.1	310.47	contig_11	23.335
				contig_33	152.372
				contig_107	139.062
	BE221unitig_15	KZ155783.1	322.813	contig_23	275.006
				contig_105	40.397
				contig_107	139.062
12	BE221unitig_14	KZ155782.1	226.705	contig_199	200.349
	BE221unitig_96	KZ155835.1	366.48	contig_7	383.021
13	BE221unitig_16	KZ155784.1	572.89	contig_135	120.61
				contig_167	397.162
				contig_189	49.069
14	BE221unitig_17	KZ155785.1	558.526	contig_90	322.277
				contig_123	174.232
				contig_14	71.293
15	BE221unitig_1	KZ155771.1	285.2	contig_35	200.655
				contig_4	88.815
	BE221unitig_23	KZ155789.1	125.746	contig_76	95.626
	BE221unitig_29	KZ155793.1	175.066	contig_138	17.52
				contig_120	39.302
				contig_182	92.731
16	BE221unitig_79	KZ155825.1	333.935	contig_5	500.809
	BE221unitig_20	KZ155787.1	189.473
17	BE221unitig_24	KZ155790.1	424.376	contig_132	116.292
				contig_181	294.484
18	BE221unitig_25	KZ155791.1	363.195	contig_109	51.455
				contig_102	28.655
				contig_156	106.811
				contig_134	43.627
				contig_147	63.305
				contig_150	52.359
19	BE221ch_1900	KZ155840.1	369.517	contig_118	145.227
				contig_66	29.826
				contig_82	42.485
				contig_10	111.723
				contig_141	26.681
20	BE221unitig_33	KZ155795.1	161.637	contig_18	178.604
	BE221unitig_86	KZ155830.1	26.996	conig_37	27.066
Mitochondrion	Mitochondrion	KC967299.1	44.237	contig_131	21.181
				contig_139	12.866
Chloroplast	Chloroplast	KF285526.1	75360	contig_161	35.296
				contig_157	26.931
