# Supplementary figures and images for: Combining Nanopore and Illumina Sequencing Permits Detailed Analysis of Insertion Mutations and Structural Variations Produced by PEG-Mediated Transformation in <em>Ostreococcus tauri</em>
Source: Preprints.org preprint supplement (doi:10.20944/preprints202102.0506.v1), 2021-02-23

Figure S7. Primers used in this study to confirm the flanking junctions in T3, T6 and T16 lines.
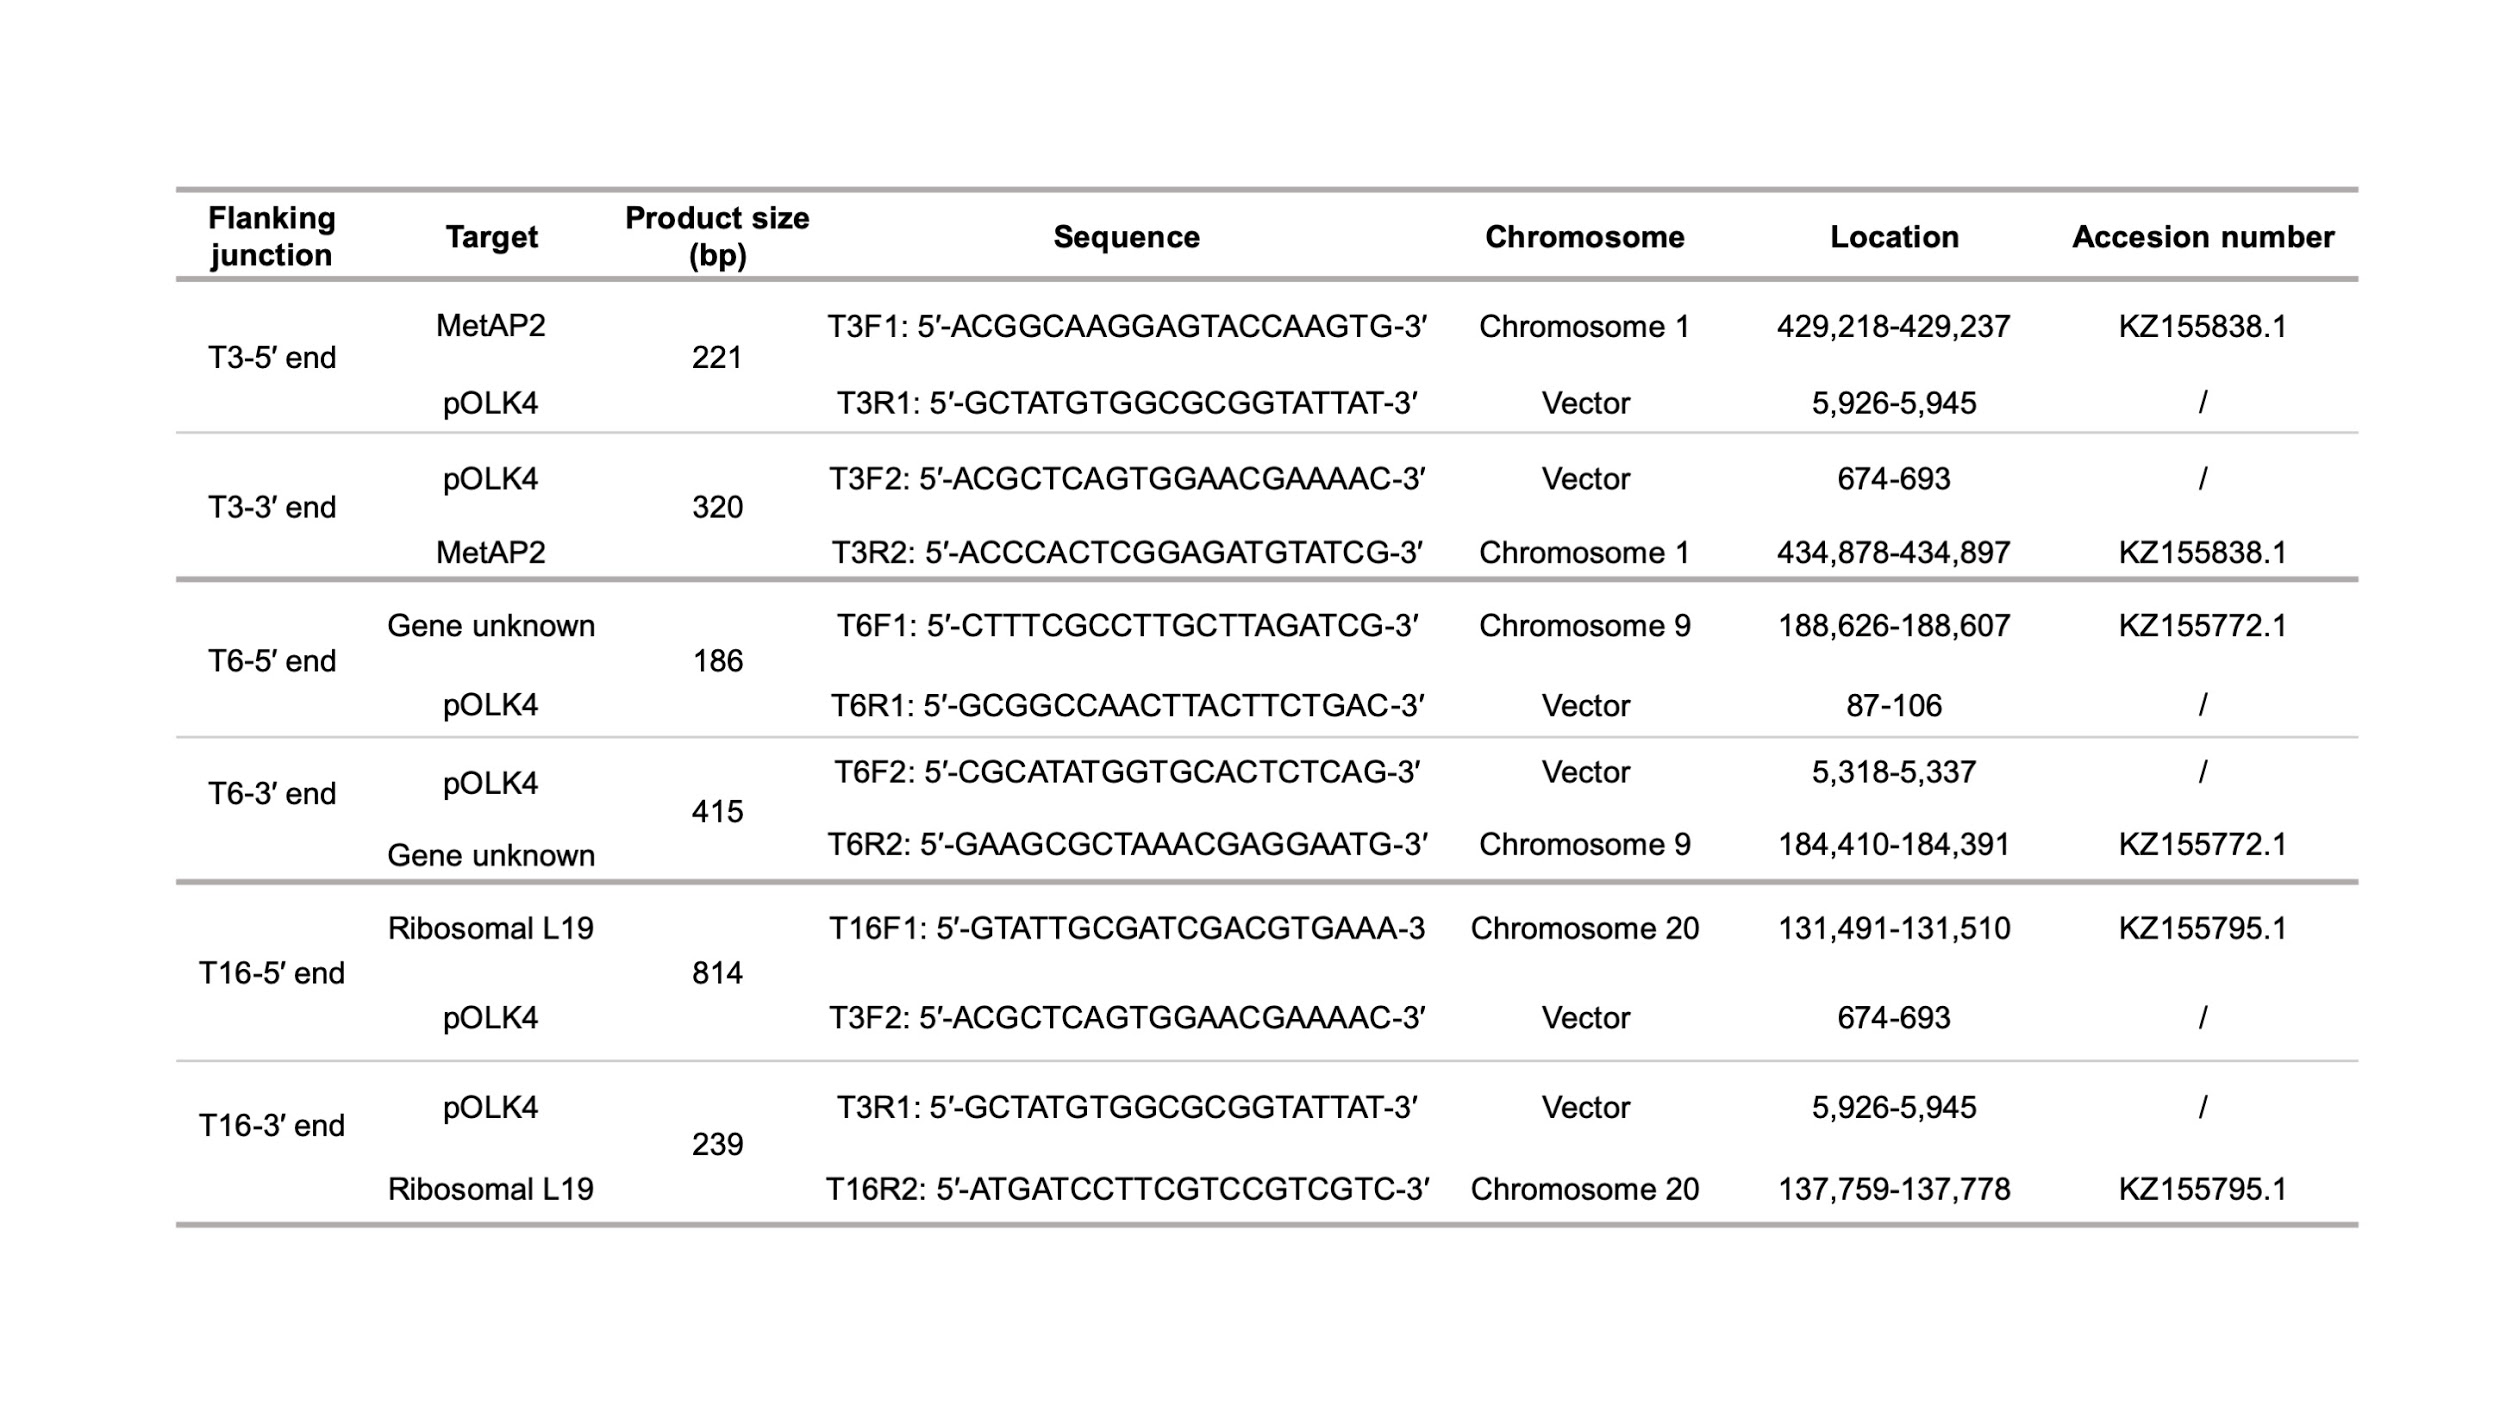

Supplement: Supplementary file 7 [file Figure_S7.docx]
